# Supplementary material for: Comparative assessment of the phase transfer behaviour of InP/ZnS and CuInS/ZnS quantum dots and CdSe/ZnS quantum dots under varying environmental conditions
Source: Royal Society of Chemistry journal article supplement (doi:10.1039/c8en01073k), 2019-01-01

## Supporting Information

### FTIR Results for QDs

1. Cd- OA, Cd-ODA, Cd-OAm (organic phase and aqueous phase)
2. CIS-OA, CIS-ODA, CIS-OAm (organic phase and aqueous phase)
3. InP-OA, InP-ODA, InP-OAm (organic phase and aqueous phase)

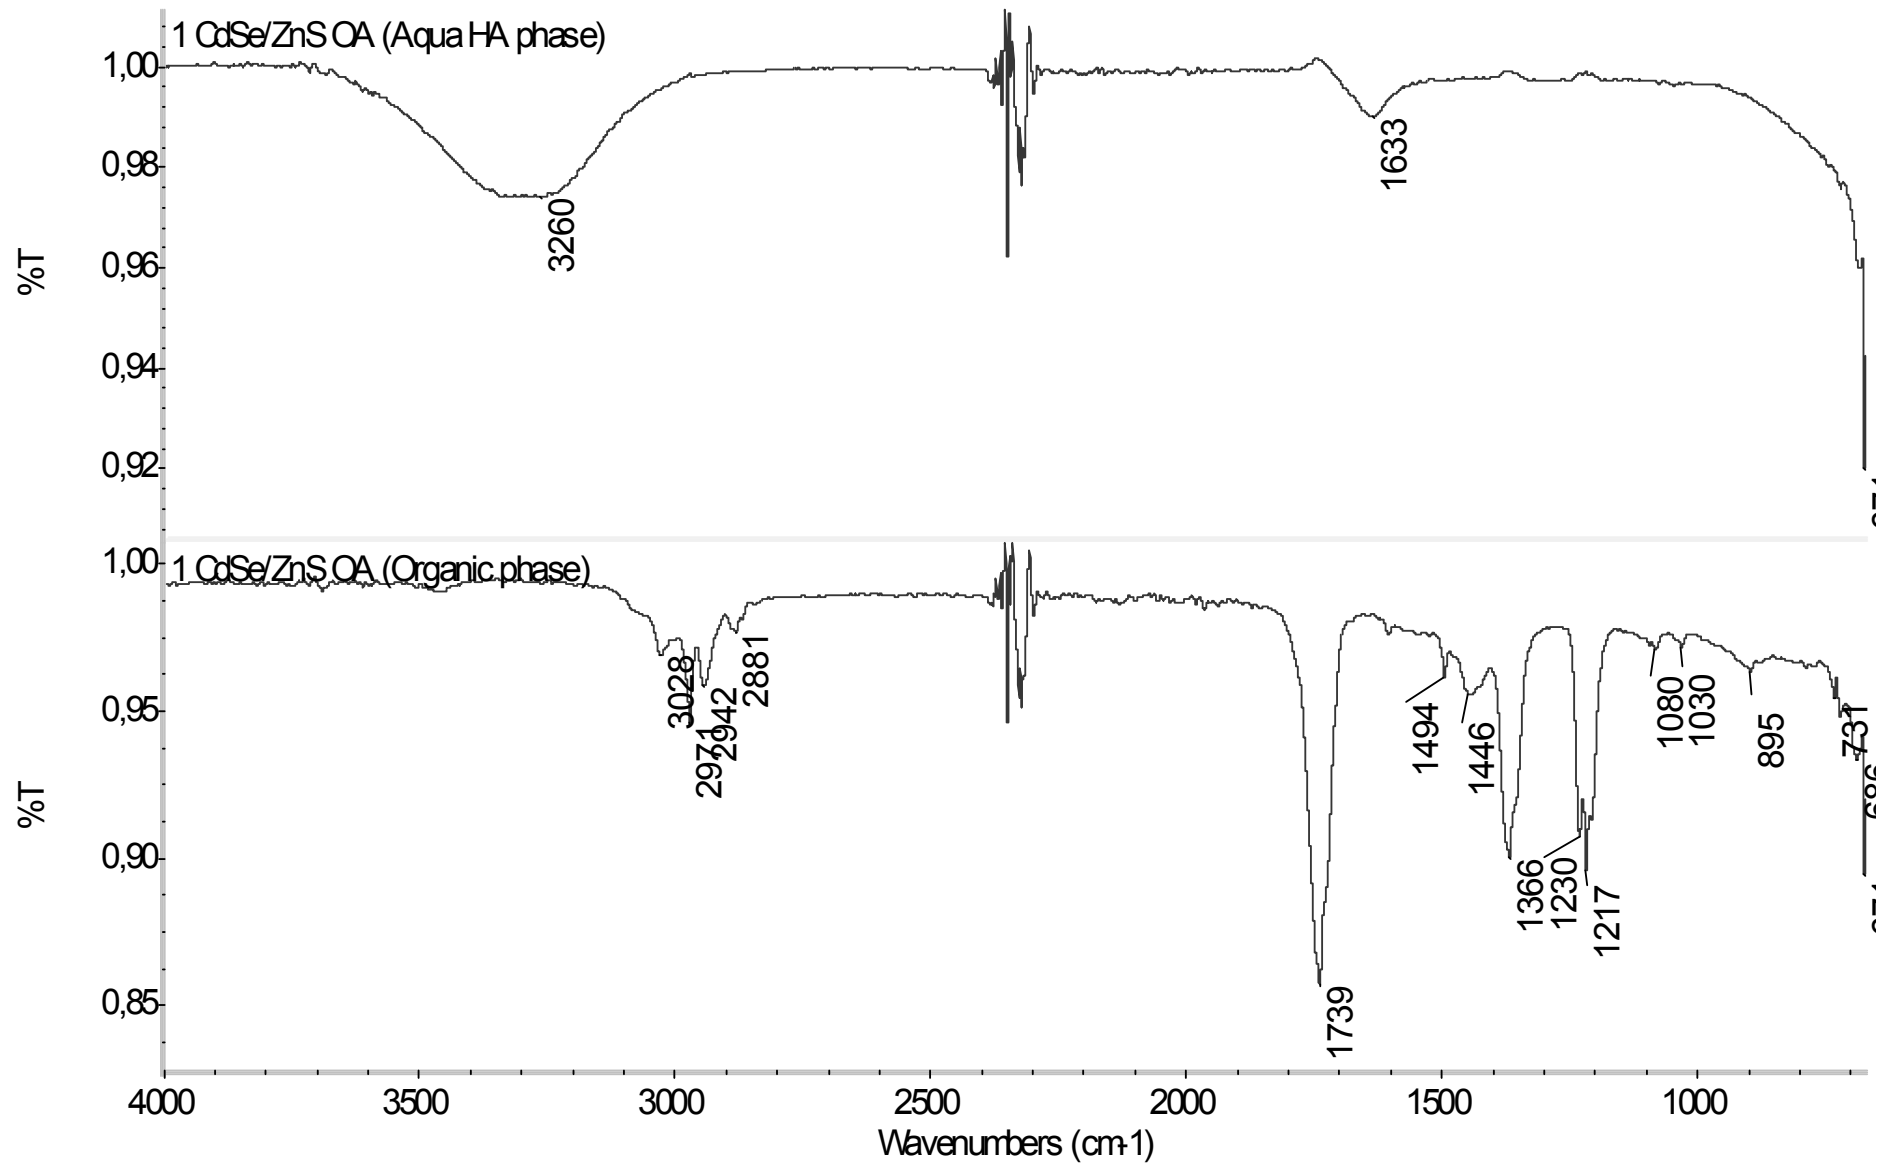

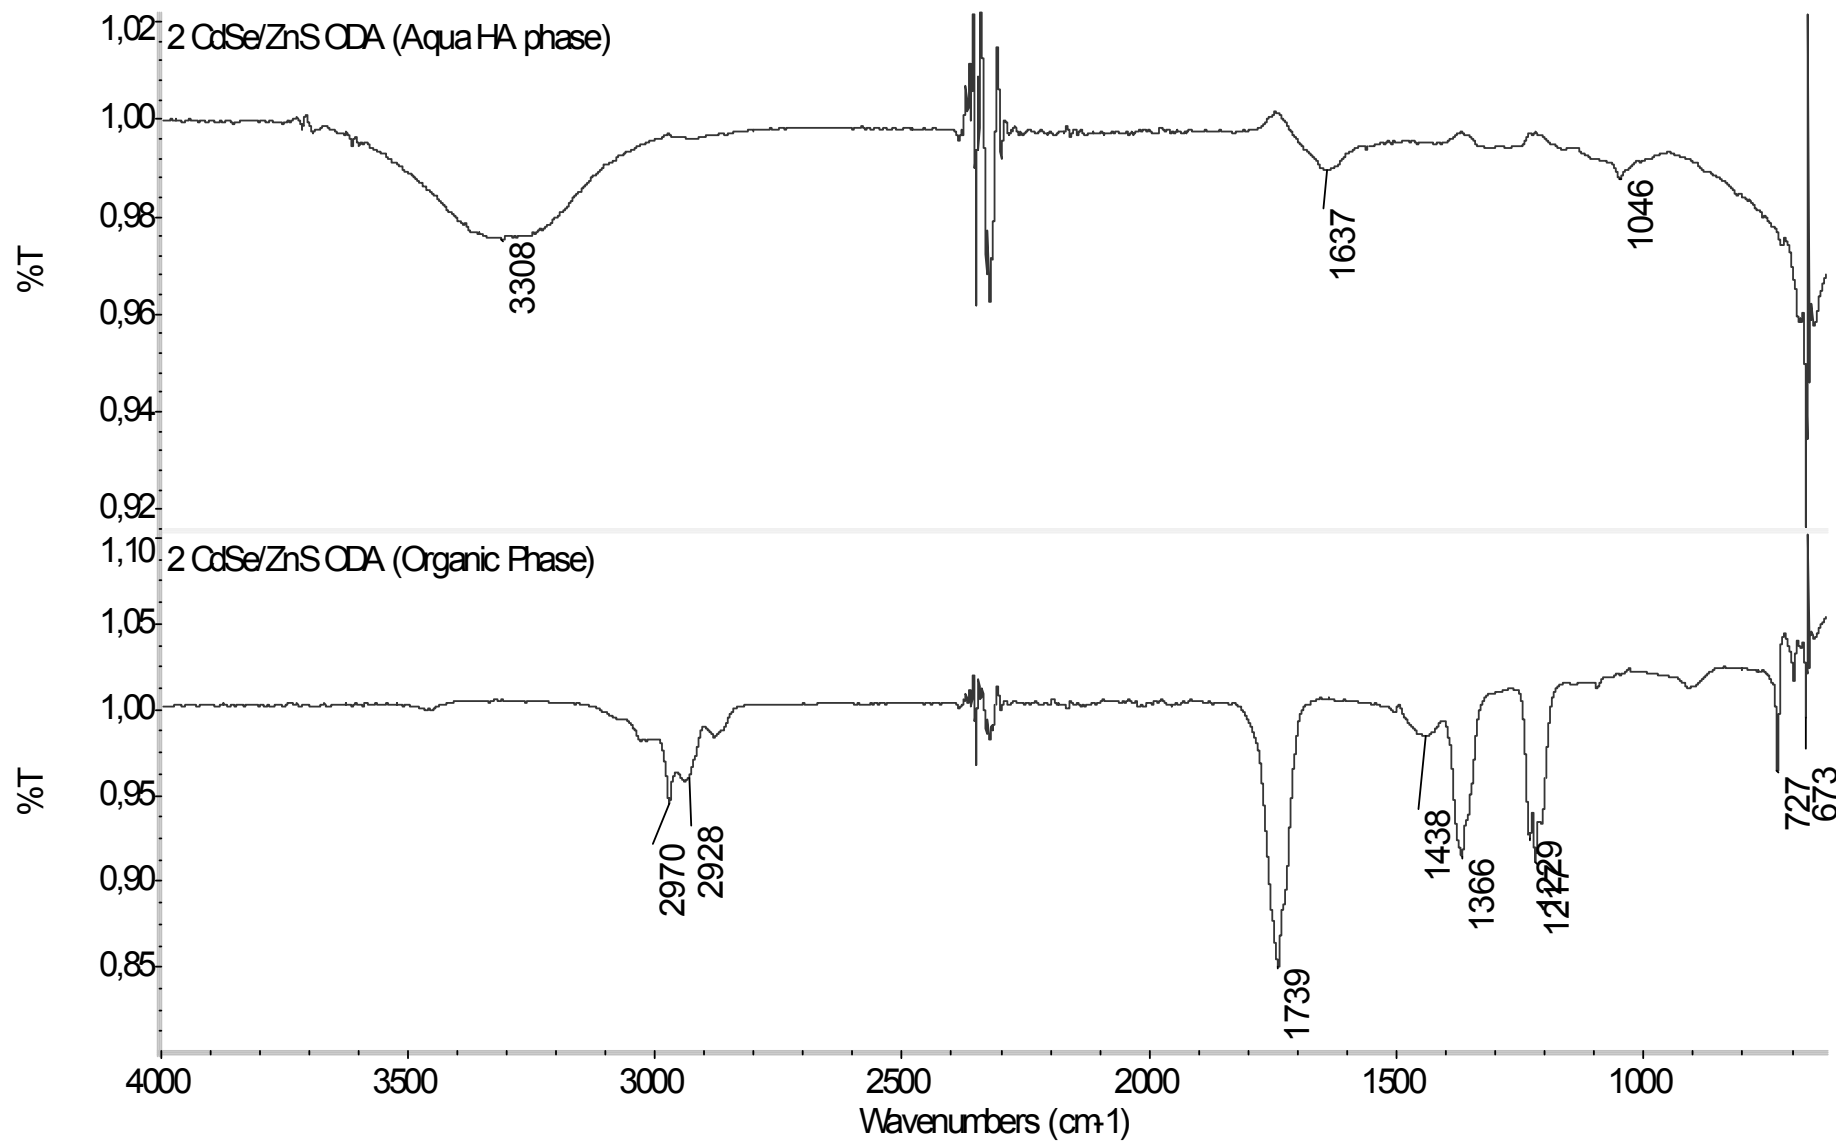

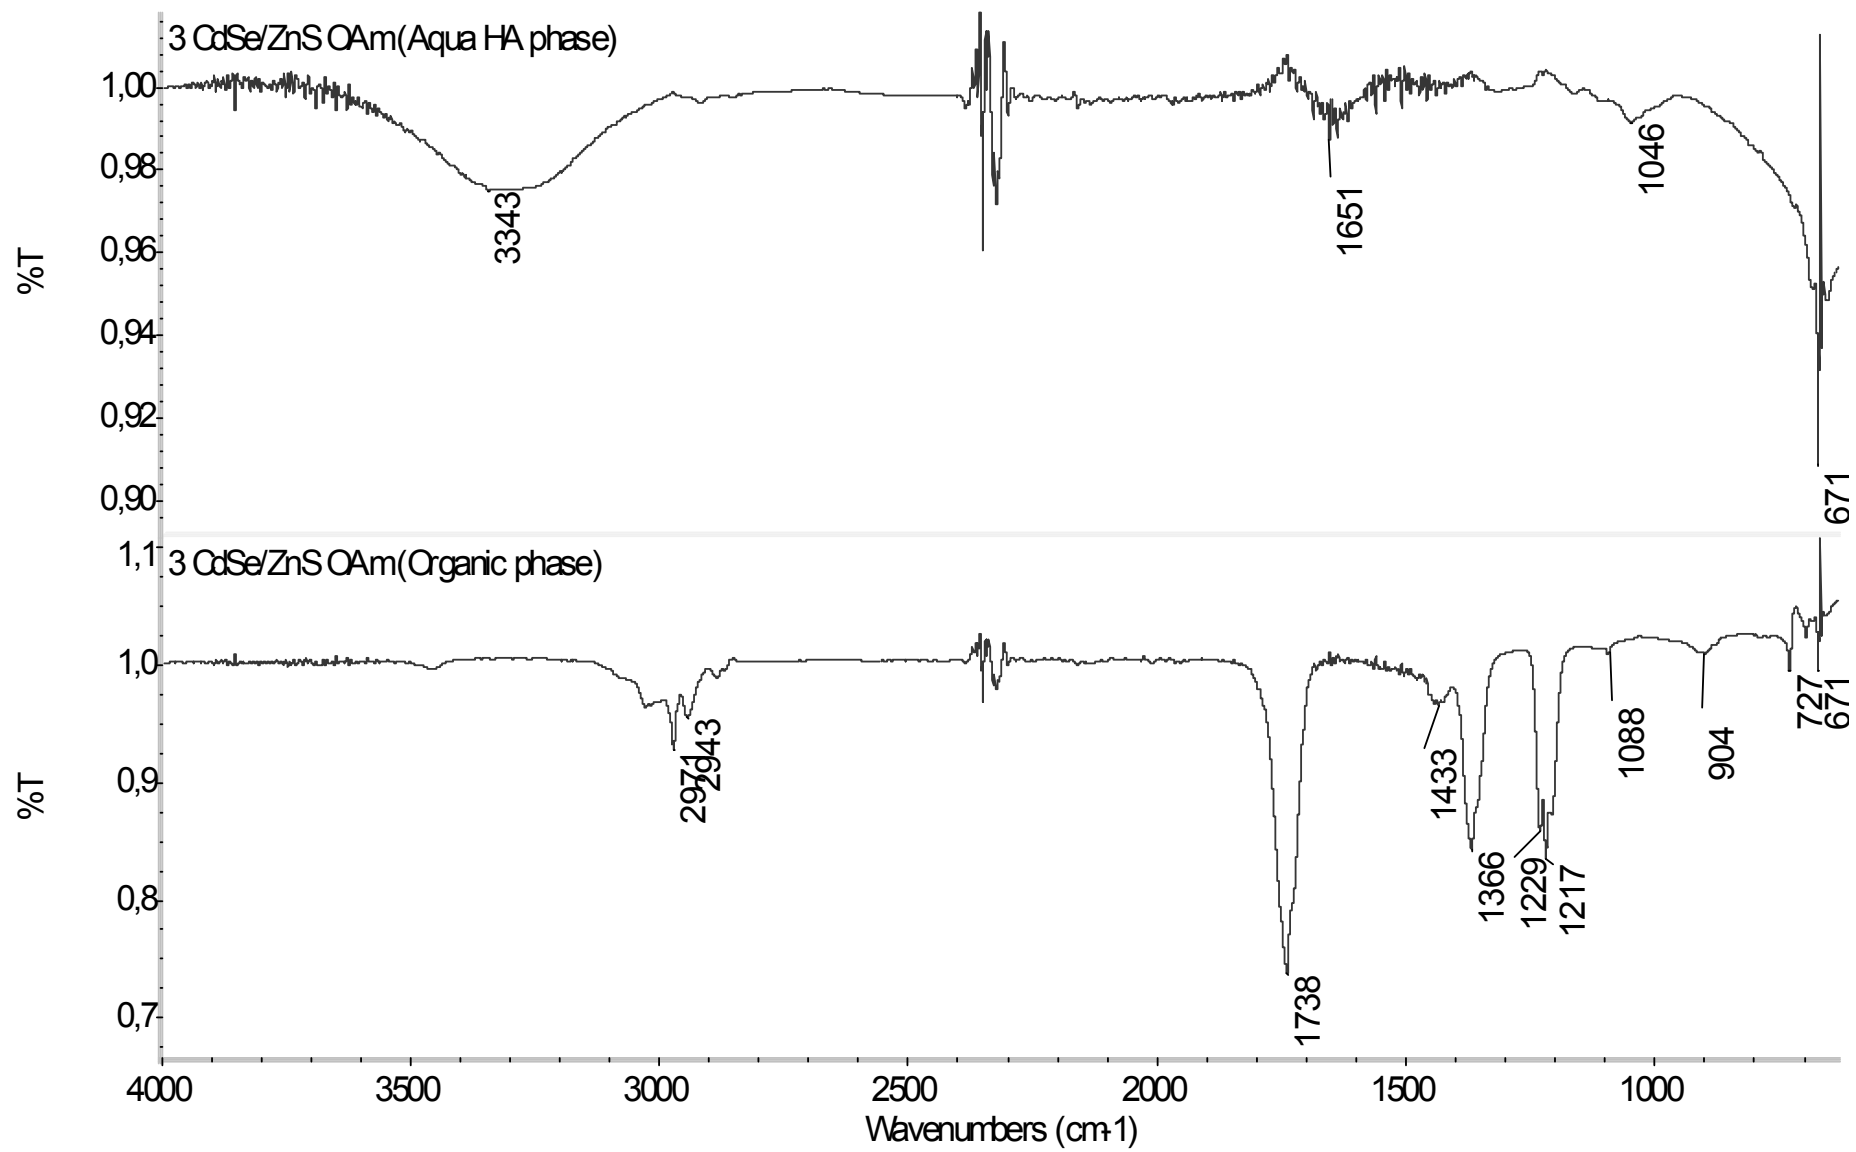

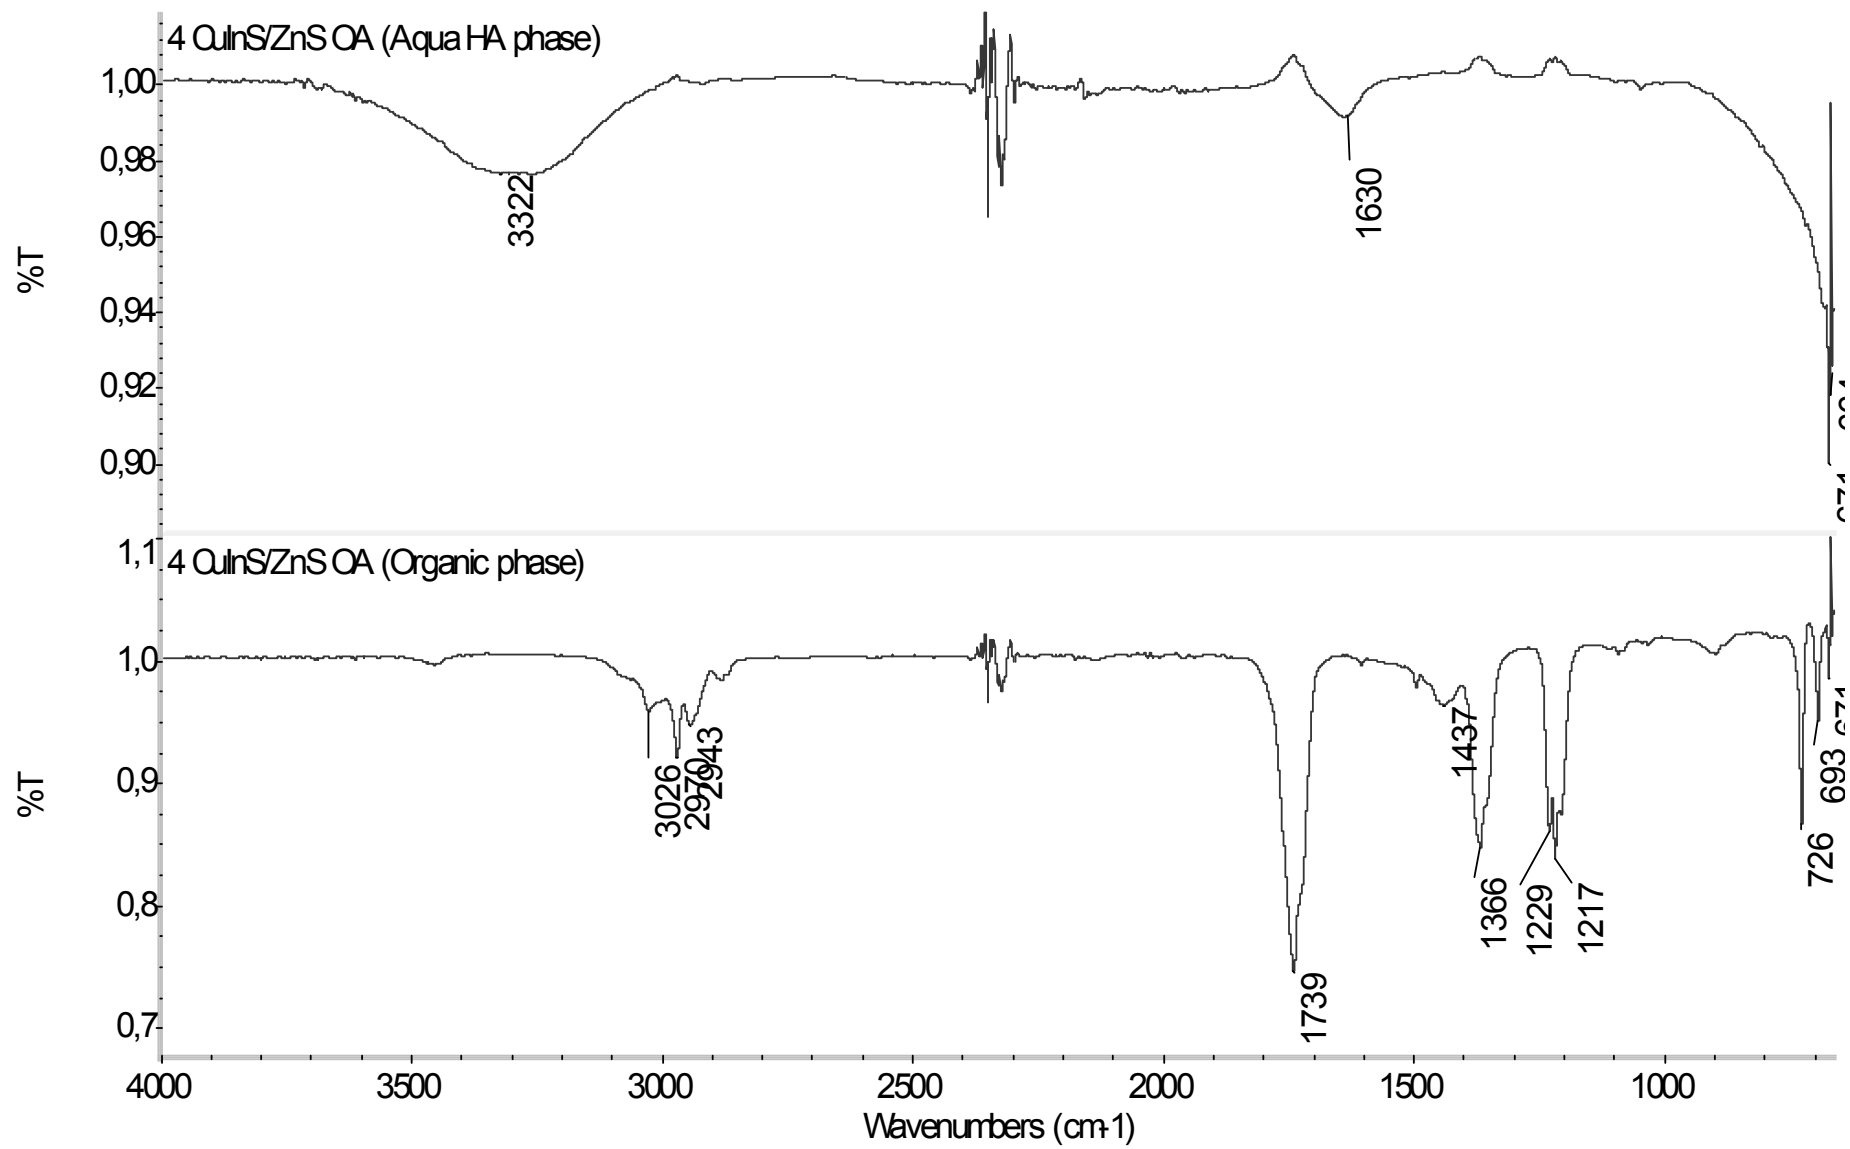

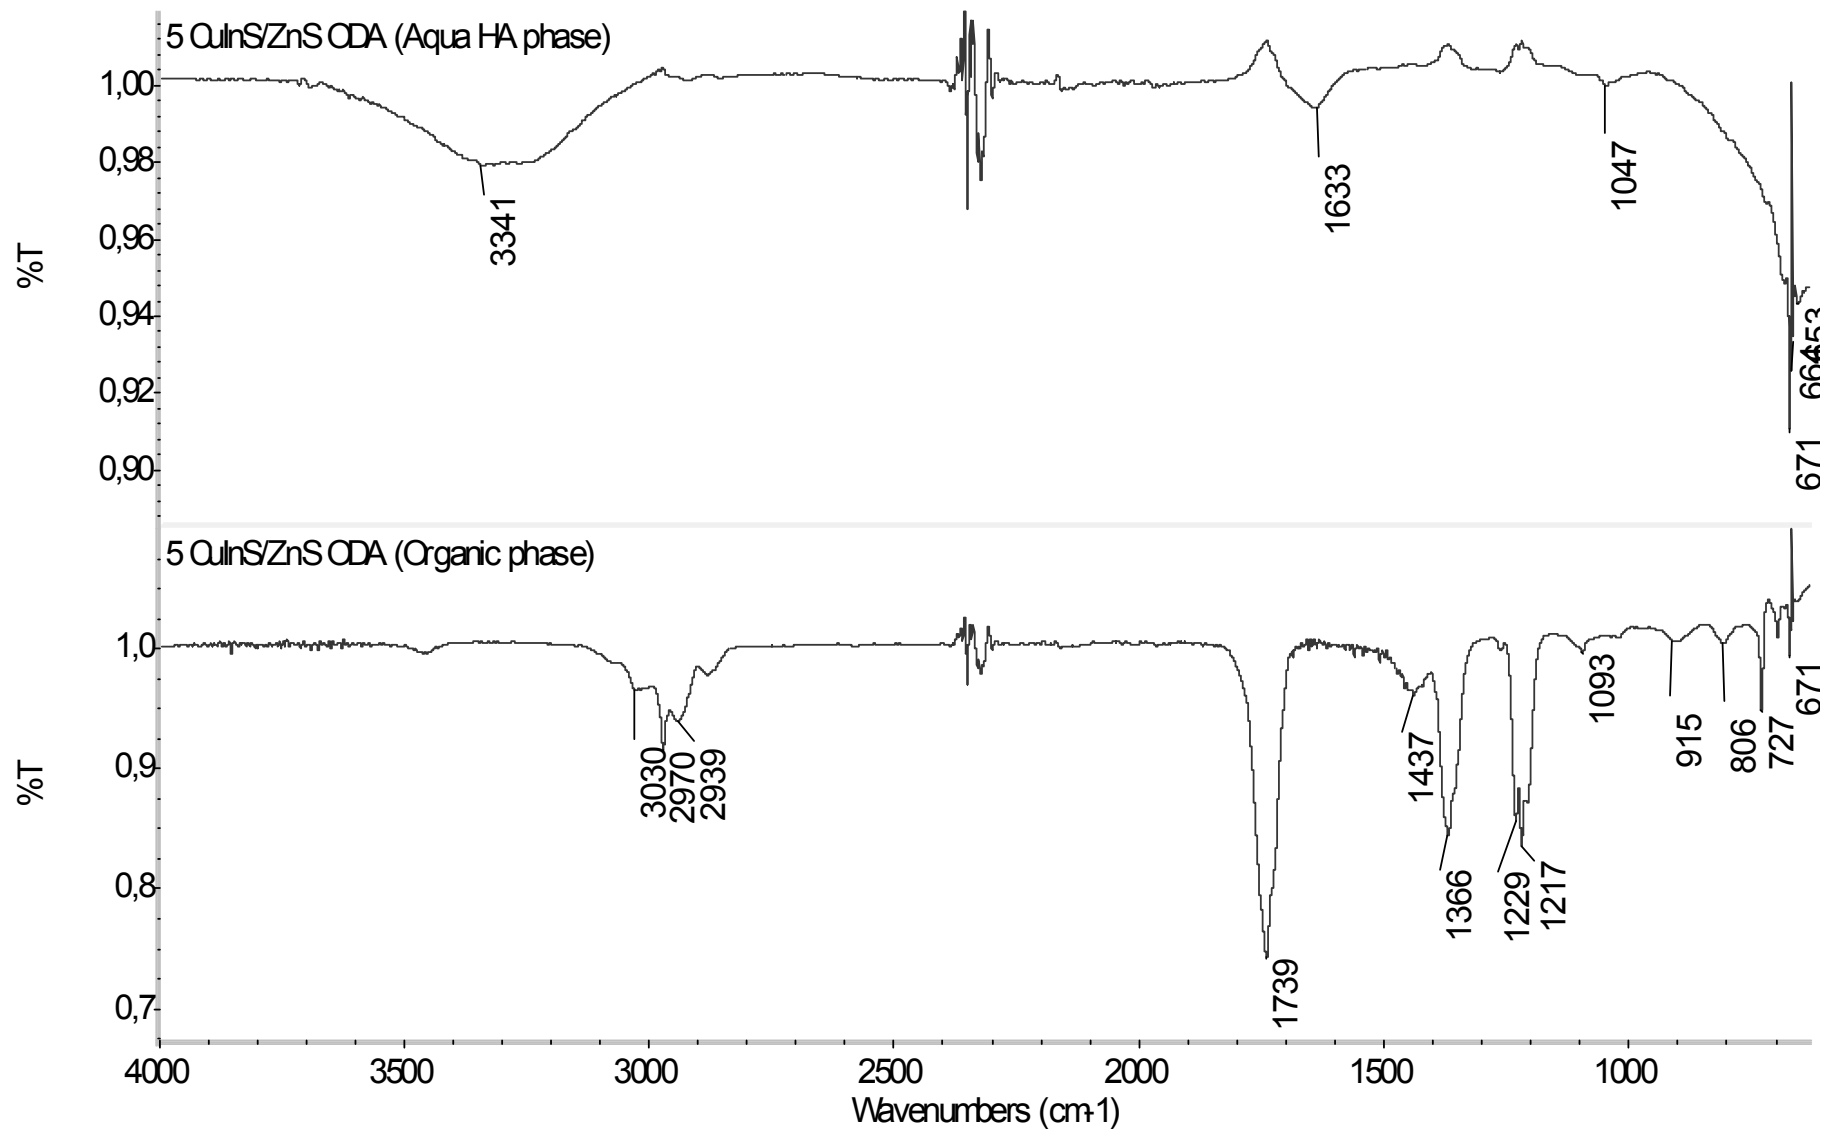

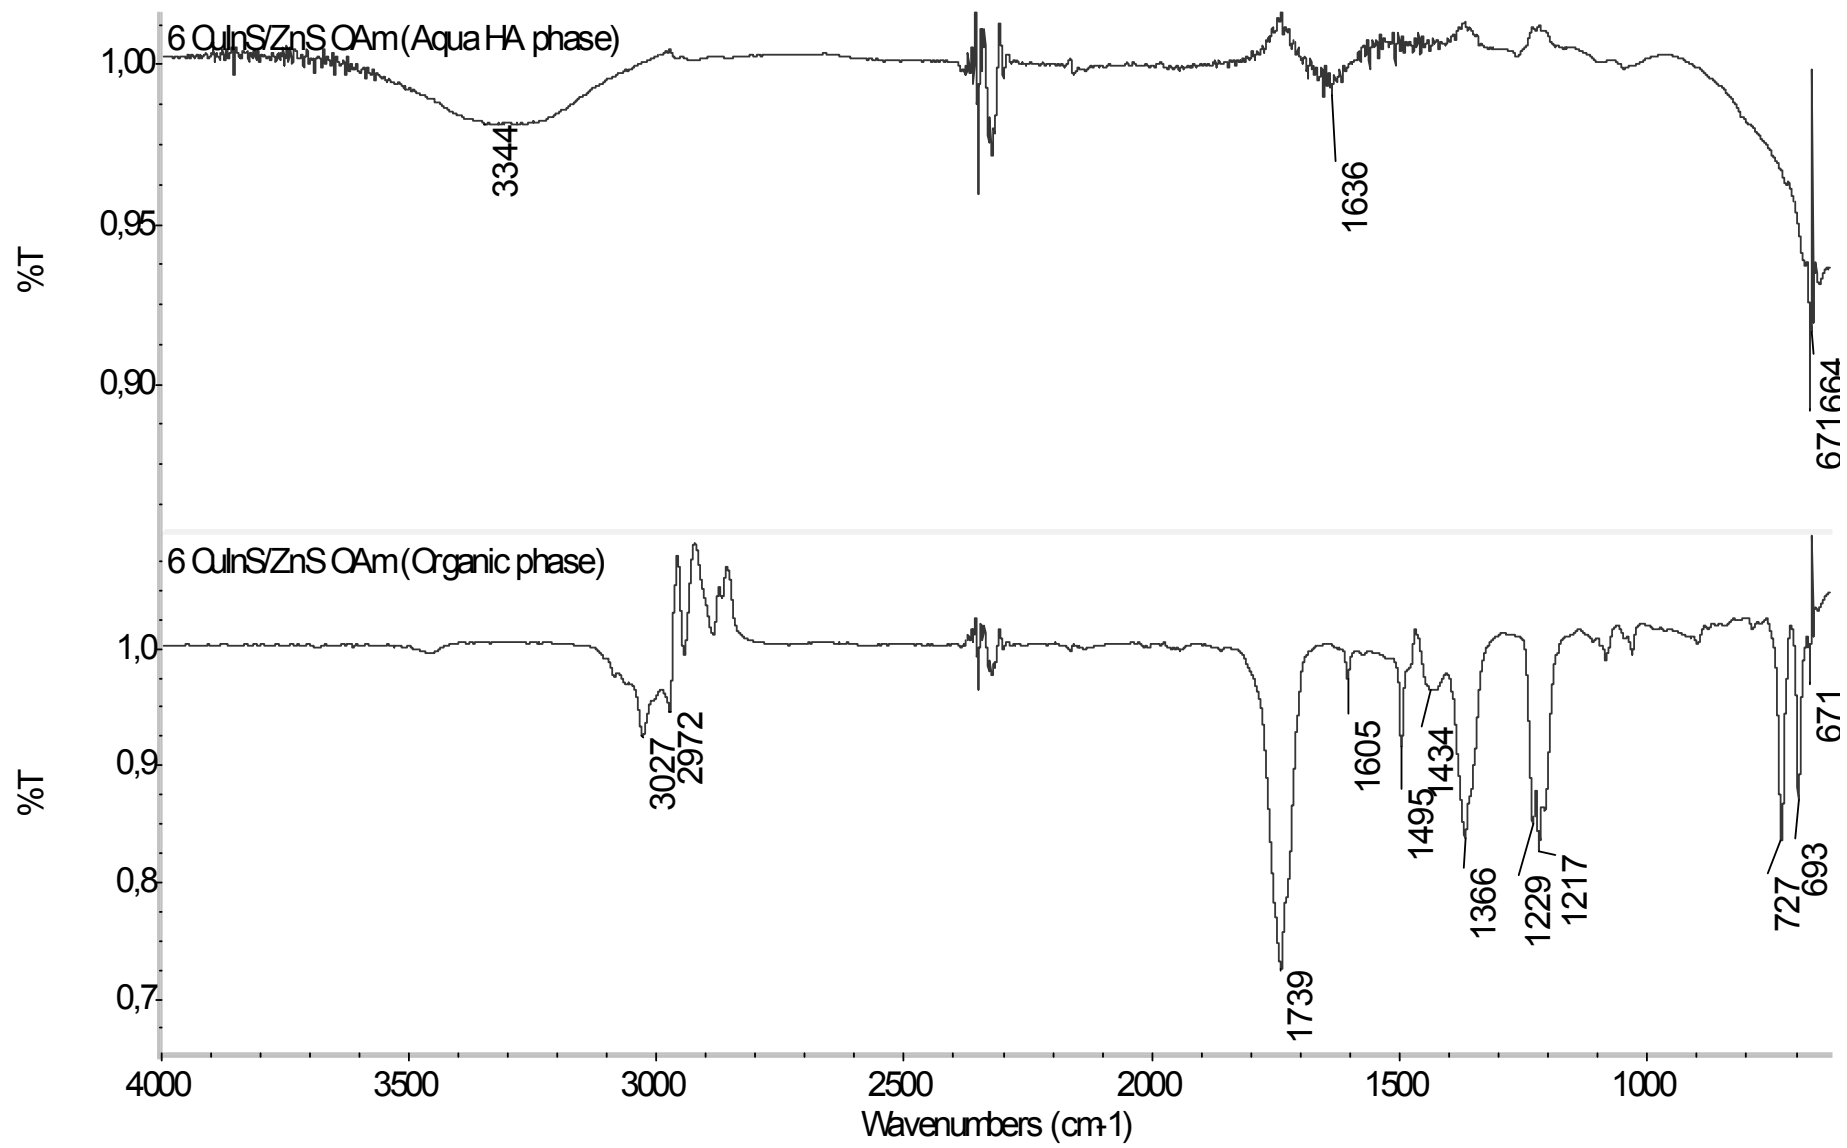

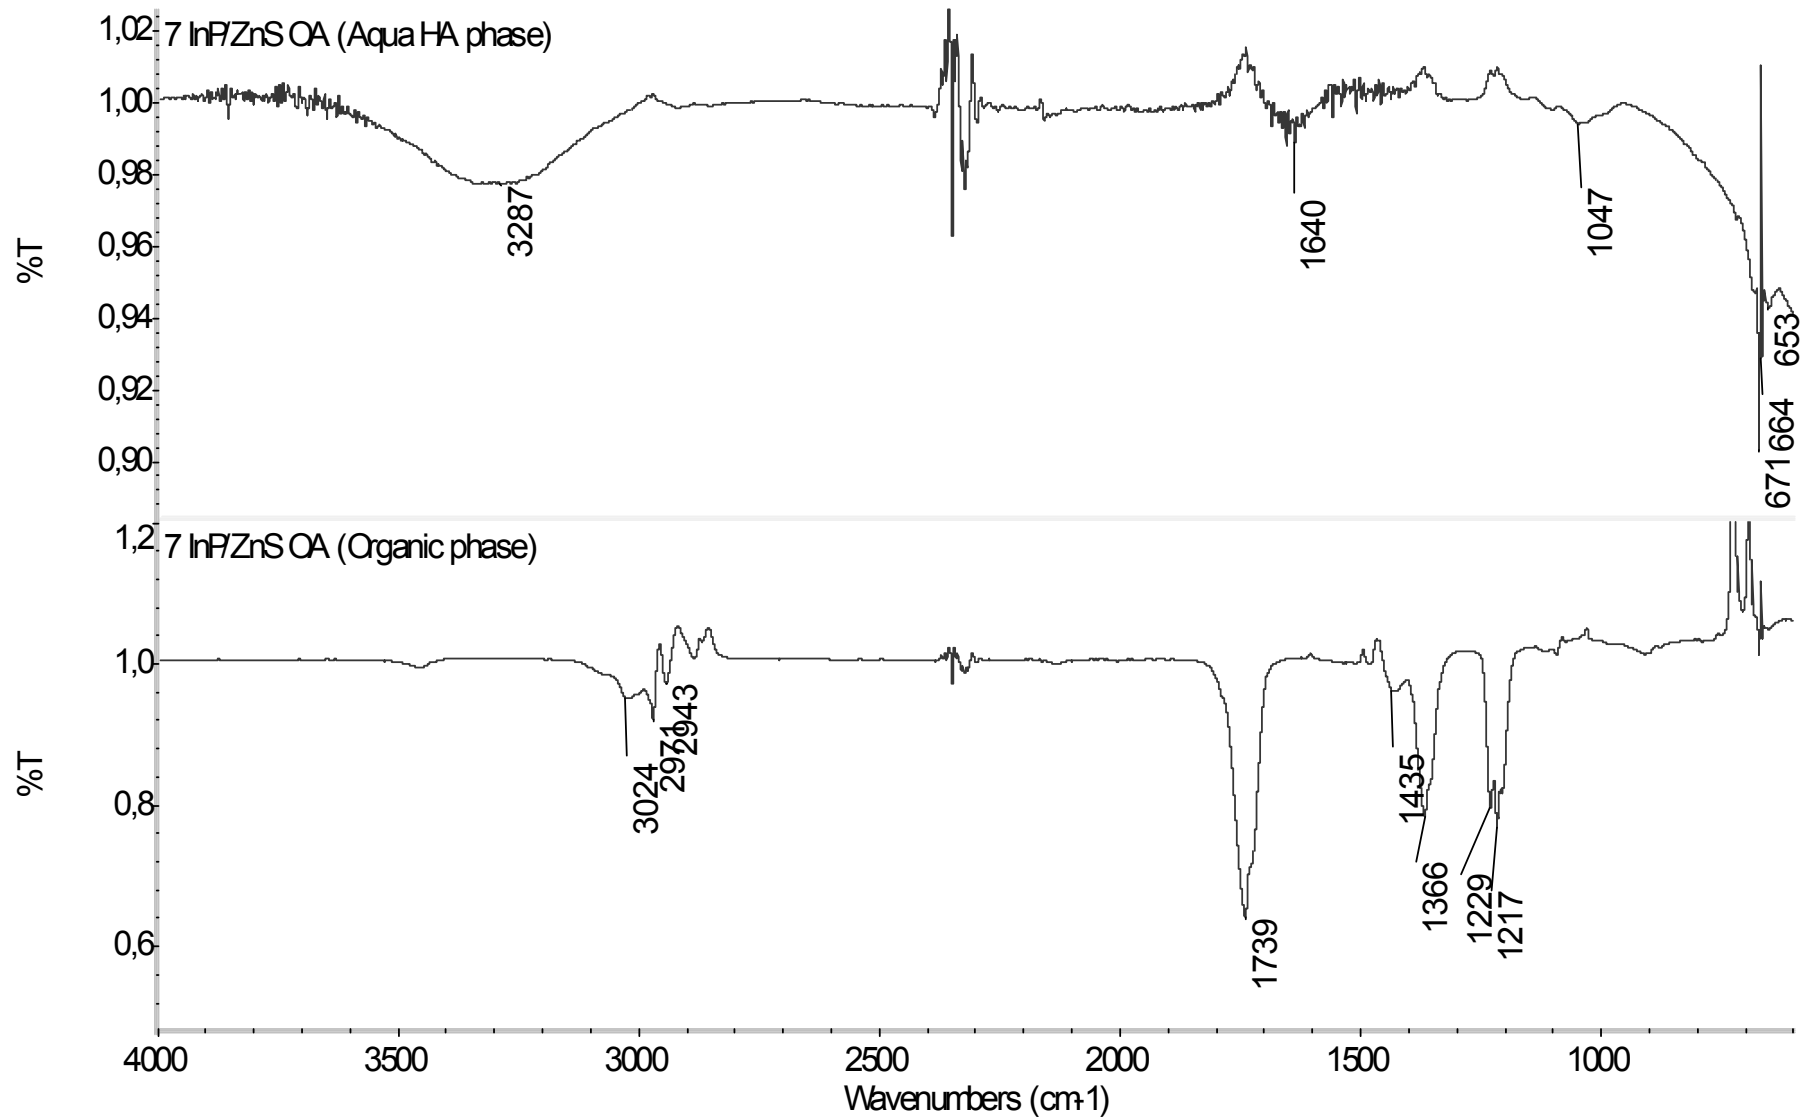



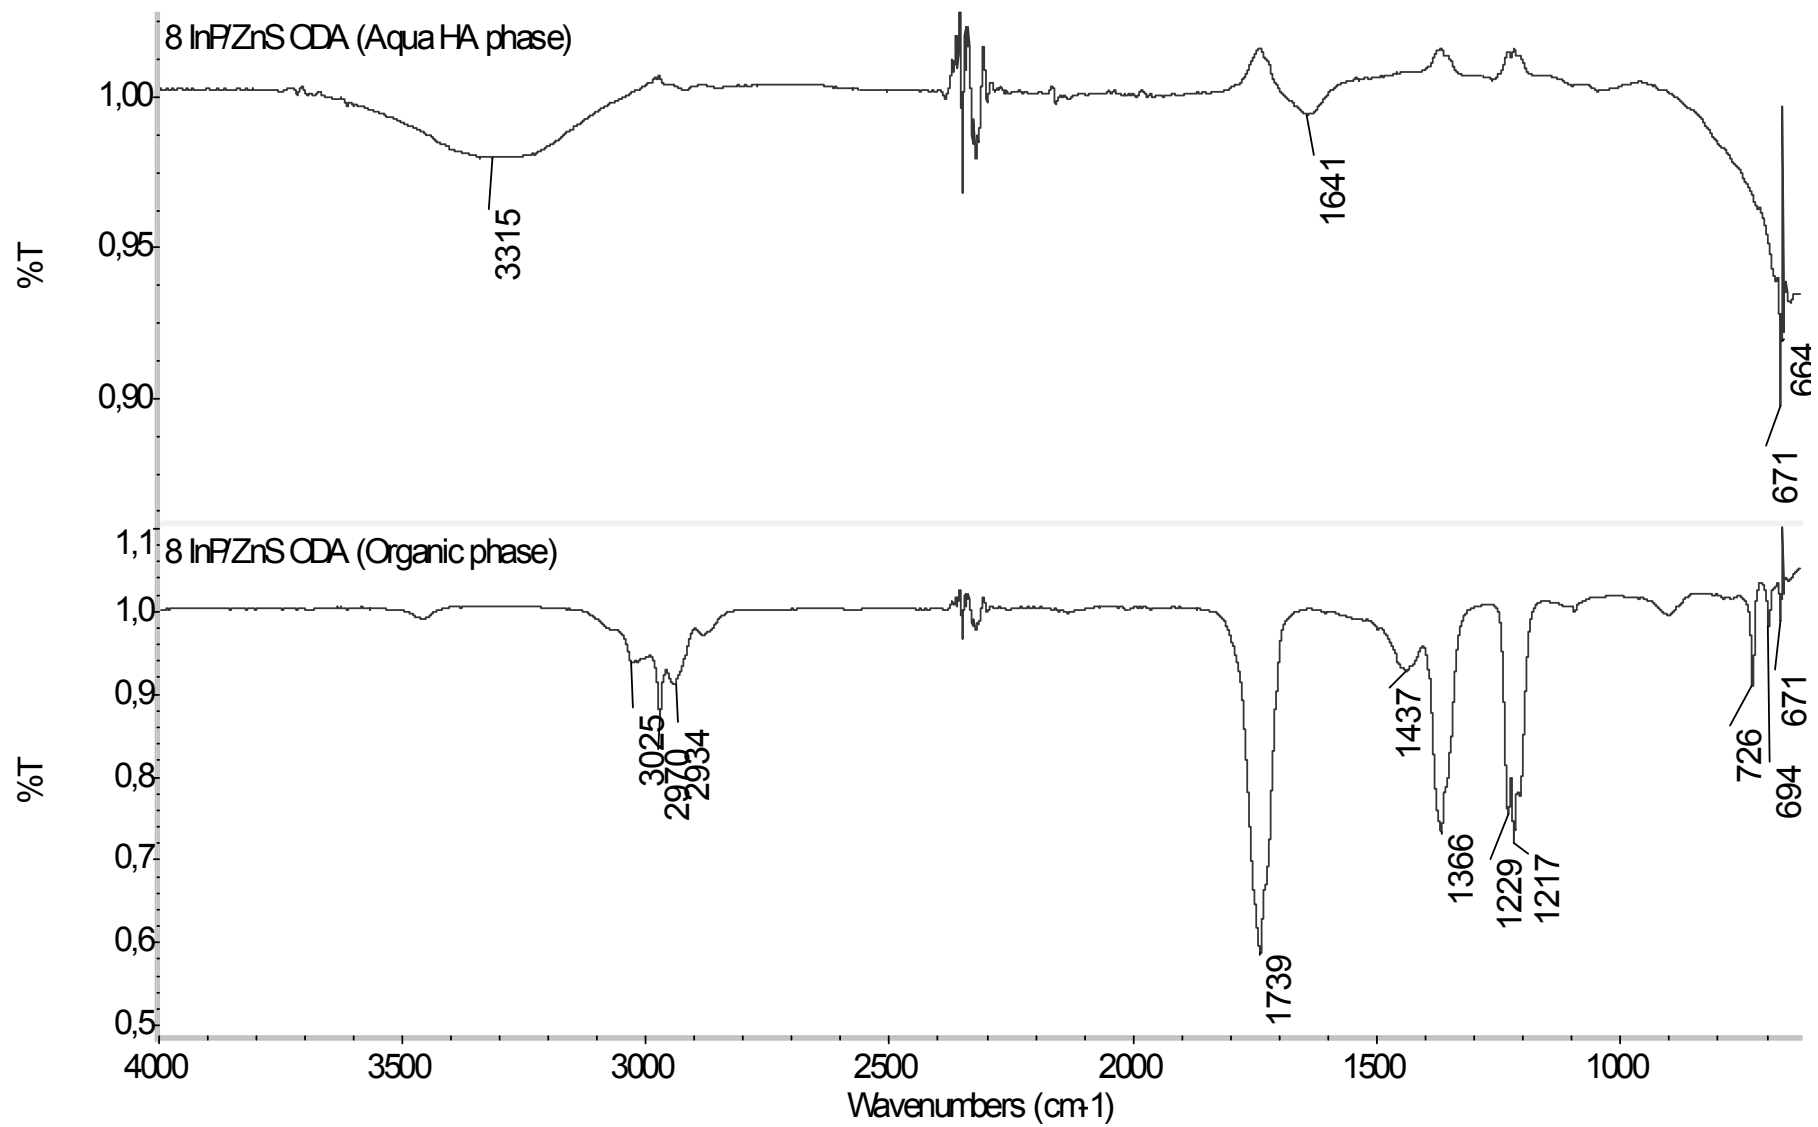

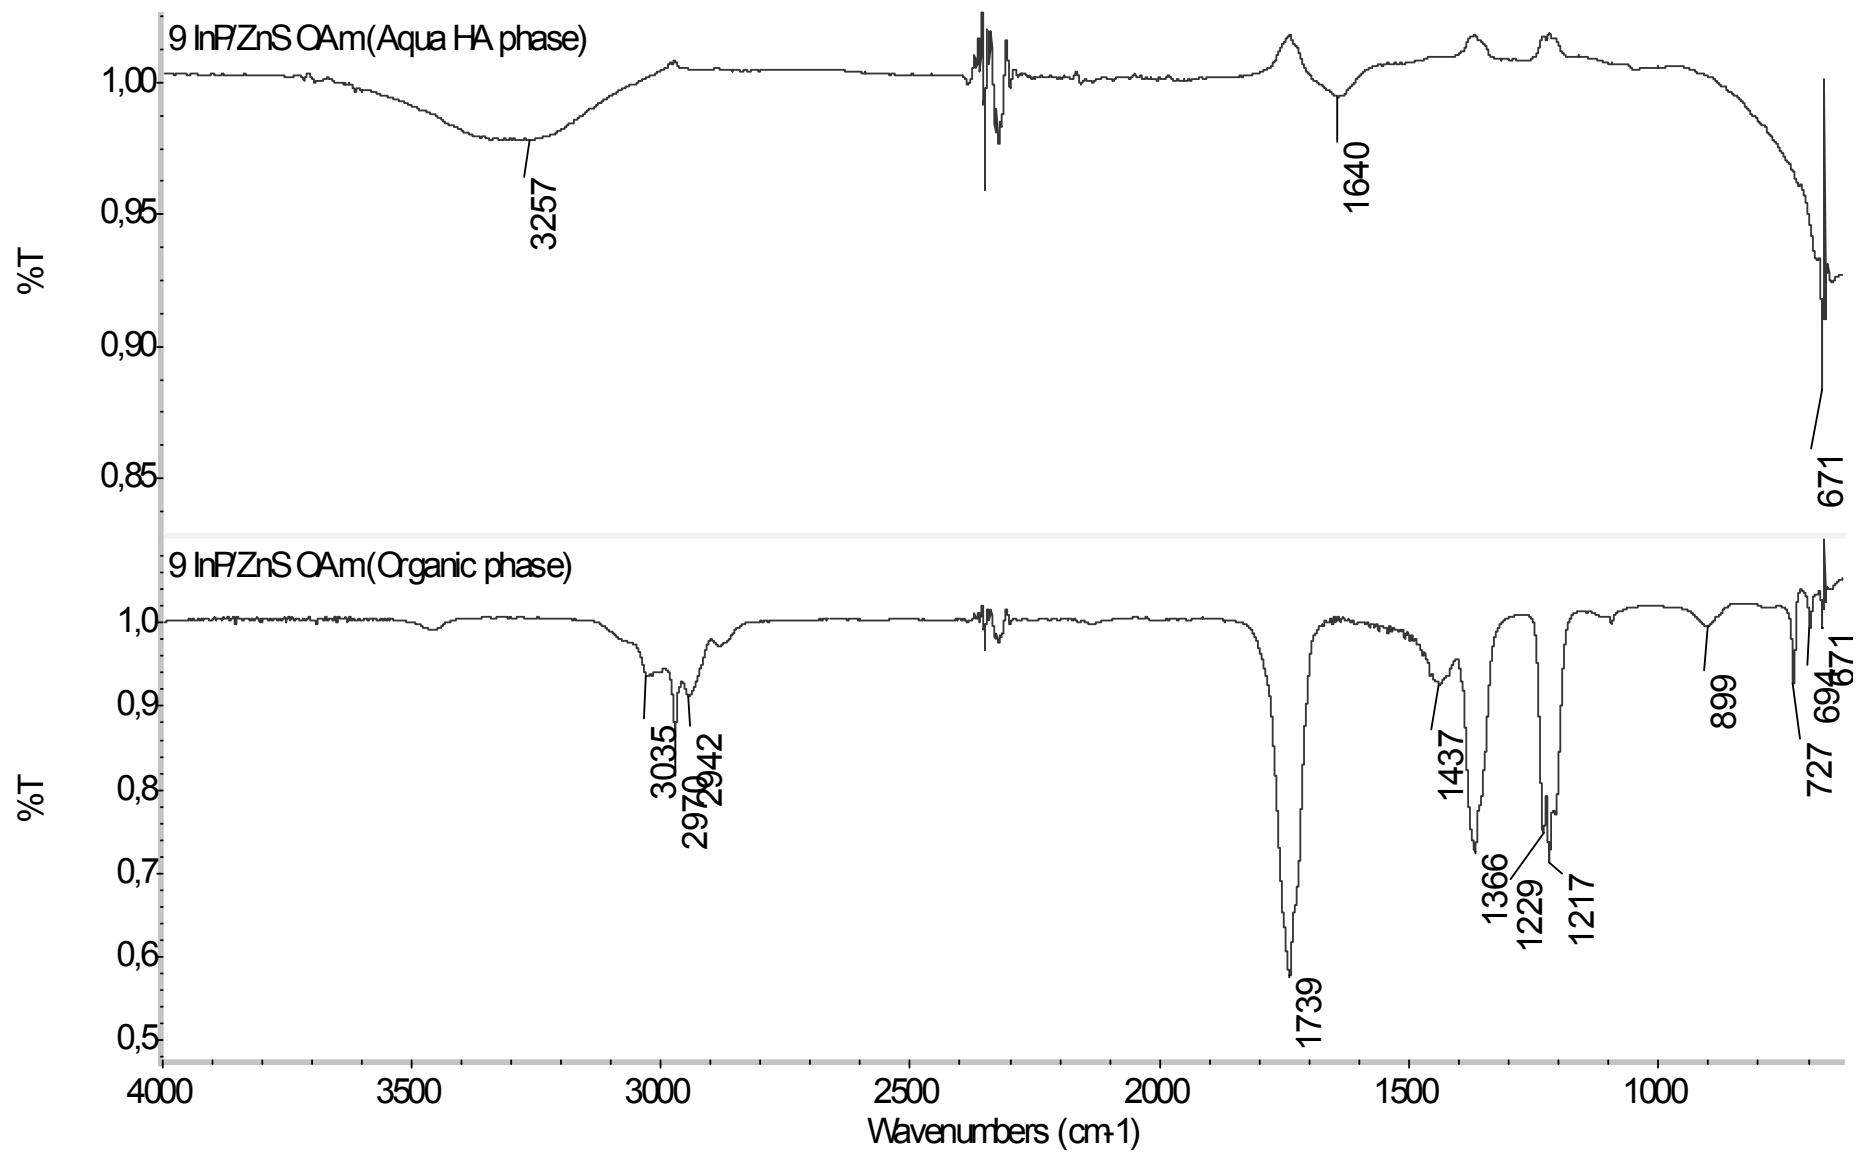

Supplement: c8en01073k1.pdf [file c8en01073k1.pdf]
